# Supplementary material
Source: PubMed Central journal article supplement (PMC2749798)
Supplement: mmc1.pdf [file mmc1.pdf]

Biophysical Journal, Volume 97

**Supporting Material**

**Sarcomere Mechanics in Capillary Endothelial Cells**

Robert J. Russell, Shen-Ling Xia, Richard B Dickinson, and Tanmay P. Lele

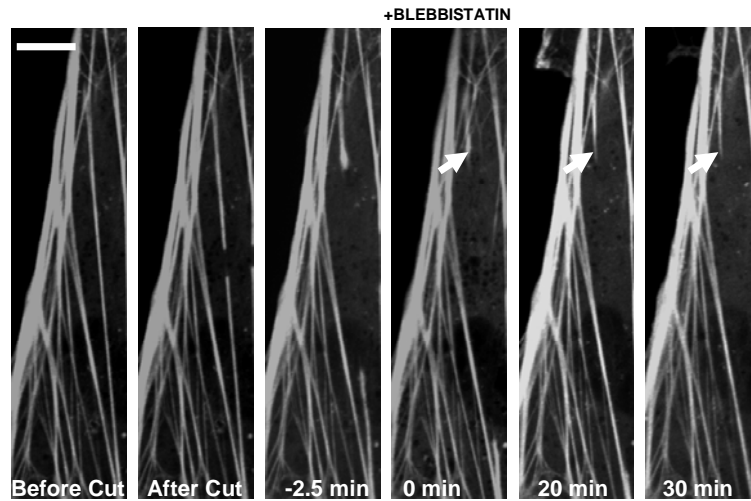

**Supplemental Figure 1:** Potential energy is not stored in a severed stress fiber. The stress fiber was severed with a femtosecond laser and allowed to reach steady state (marked by arrow). Myosin activity was poisoned with 50  $\mu$ M blebbistatin and confocal micrographs were taken after 20 and 30 minutes. The fiber did not lengthen or relax (marked by arrow) during the time course indicating that potential energy was not stored in the contracted fiber. (Scale bar 10  $\mu$ m).
